# **A novel ALDH1A1 inhibitor blocks platinum-induced senescence and stemness in ovarian cancer**

**Vaishnavi Muralikrishnan<sup>1</sup>, Fang Fang<sup>3</sup>, Tyler C. Given<sup>1</sup>, Ram Podicheti<sup>6</sup>, Mikhail Chchterbinine<sup>4</sup>, Shruthi Sriramkumar<sup>1</sup>, Heather M. O'Hagan<sup>1,2,3</sup>, Thomas D. Hurley<sup>4\*</sup>, Kenneth P. Nephew<sup>1,2,5\*</sup>**

<sup>1</sup>Cell, Molecular and Cancer Biology Graduate Program and Medical Sciences Program, Indiana University School of Medicine, Bloomington, IN, 47405, USA.

<sup>2</sup>Indiana University Melvin and Bren Simon Comprehensive Cancer Center, Indianapolis, IN, 46202, USA.

<sup>3</sup>Department of Medical and Molecular Genetics, Indiana University School of Medicine, Indianapolis, IN.

<sup>4</sup>Department of Biochemistry and Molecular Biology, Indiana University School of Medicine, Indianapolis, IN.

<sup>5</sup>Department of Anatomy, Cell Biology and Physiology; Department of Obstetrics and Gynecology, Indiana University School of Medicine, Indianapolis, IN, 46202, USA.

<sup>6</sup>Center for Genomics and Bioinformatics, Indiana University, Bloomington, IN.

\*Corresponding authors. 1001 East 3<sup>rd</sup> Street, Room 302, Bloomington, IN 47405. (812) 855-9445. [knephew@indiana.edu](mailto:knephew@indiana.edu); 635 Barnhill Drive Medical Science, Room MS4019, Indianapolis, IN 46202. (317) 278-2008. [thurley@iupui.edu](mailto:thurley@iupui.edu)

**Key words:** Ovarian cancer, ALDH1A1, cancer stem cells, senescence, chemotherapy resistance

**Financial support:** This project was funded with support from the Indiana Clinical and Translational Sciences Institute funded, in part by Grant Number UL1TR002529 from the National Institutes of Health, National Center for Advancing Translational Sciences, Clinical and Translational Sciences Award; and through the IU Simon Comprehensive Cancer Center P30 Support Grant (P30CA082709-20). The content is solely the responsibility of the authors and does not necessarily represent the official views of the National Institutes of Health.

**Conflict of interest statement:** The authors declare no potential conflicts of interest.

## 1 **Abstract**

2 Ovarian cancer is a deadly disease attributed to late-stage detection as well as recurrence  
3 and development of chemoresistance. Ovarian cancer stem cells (OCSCs) are hypothesized to  
4 be largely responsible for emergence of chemoresistant tumors. Although chemotherapy may  
5 initially succeed at decreasing the size and number of tumors, it leaves behind residual malignant  
6 OCSCs. In this study, we demonstrate that Aldehyde dehydrogenase 1A1 (ALDH1A1) is essential  
7 for the survival of OCSCs. We identified a first in class ALDH1A1 inhibitor, compound 974, and  
8 used 974 as a tool to decipher the mechanism of stemness regulation by ALDH1A1. Treatment  
9 of OCSCs with 974 significantly inhibited ALDH activity, expression of stemness genes, spheroid,  
10 and colony formation. In vivo limiting dilution assay demonstrated that 974 significantly inhibited  
11 CSC frequency. Transcriptomic sequencing of cells treated with 974 revealed significant  
12 downregulation of genes related to stemness and chemoresistance as well as senescence and  
13 senescence associated secretory phenotype (SASP). We confirmed that 974 inhibited  
14 senescence and stemness induced by platinum-based chemotherapy in functional assays.  
15 Overall, these data establish that ALDH1A1 is essential for OCSCs survival and ALDH1A1  
16 inhibition suppresses chemotherapy induced senescence and stemness. Targeting ALDH1A1  
17 using small molecule inhibitors in combination with chemotherapy therefore presents a promising  
18 strategy to prevent ovarian cancer recurrence and has potential for clinical translation.

## 19 **Introduction**

20 Ovarian cancer is the most fatal gynecological malignancy[1]. In the US, ovarian cancer  
21 was the fifth leading cause of death among women and worldwide accounted for over 200,000  
22 deaths in 2020[2]. High grade serous (HGS) is the most widely diagnosed subtype and accounts  
23 for 70-80% of ovarian cancer deaths [3]. Cytoreductive surgery and combination platinum-based  
24 chemotherapy have remained the mainstays of treatment. Although the majority of patients  
25 initially respond to chemotherapy, disease recurrence is common, and long-term survival in late-  
26 stage disease has improved little over the last four decades [4]. Mounting evidence shows that a  
27 small subpopulation of cells known as cancer stem cells (CSC) are associated with tumor relapse  
28 and chemoresistance in ovarian [5, 6] and other cancers [7]. Thus, it is essential to develop  
29 strategies to target CSC in conjunction with conventional therapies.

30  
31 CSC are characterized by asymmetric division i.e., the ability to self-renew as well as  
32 differentiate into non-CSC, resistance to chemotherapy and radiation and the ability to survive  
33 without attachment. CSC are identified by biomarkers such as CD133[8], CD44/CD117[9],  
34 LGR5[10] or overexpression of aldehyde dehydrogenase (ALDH) enzymes[11]. ALDH1A1 is a  
35 member of the ALDH family and is highly expressed by stem cells in ovarian and other  
36 cancers[12]. Ovarian cancer cells with increased ALDH1A1 expression have higher self-renewal  
37 ability[13], and HGSOC patients with tumors expressing high ALDH1A1 have poor overall  
38 survival[11]. Although ALDH1A1 is a well-accepted marker for OCSC, the exact mechanism by  
39 which ALDH1A1 regulates stemness remains incompletely understood.

40  
41 Stemness can be promoted by cellular senescence[14]. Senescence is a cellular state of  
42 irreversible growth arrest induced by oncogenic activation or DNA damaging therapies[15].  
43 Senescent cells exhibit a complex secretome known as senescence associated secretory  
44 phenotype (SASP) consisting of cytokines, chemokines, and other growth factors. Senescence

45 was initially thought to be tumor suppressive; however, recent evidence suggests that senescent  
46 cells have a pro-tumorigenic function[16]. In OC, platinum-based chemotherapy was shown to  
47 induce the CSC phenotype[17] and residual tumors after platinum treatment were enriched for  
48 ALDH+ cells[18]. Furthermore, platinum was shown to promote ovarian cancer stemness by  
49 paracrine signaling via SASP[19, 20], which could contribute to CSC enrichment.

50  
51 To study the functional role of ALDH1A1 in OCSC, we identified a specific small molecule  
52 inhibitor, compound 974 (hereafter referred to as 974). This inhibitor acts as a unique tool to  
53 selectively block ALDH1A1 activity over other ALDH isoforms. We demonstrated that 974  
54 inhibited stemness phenotypes in ovarian cancer cell lines expressing ALDH1A1 and in vivo  
55 limiting dilution analysis demonstrated an essential role for ALDH1A1 in CSC survival.  
56 Furthermore, transcriptomic sequencing of 974-treated HGSOC cells showed downregulation of  
57 pathways related to stemness and chemoresistance, including NF $\kappa$ B, IL6 signaling, xenobiotic  
58 metabolism, drug efflux and senescence, and 974 treatment blocked chemotherapy induced  
59 senescence and stemness. These results for the first time suggest a novel role for ALDH1A1 in  
60 maintenance of stemness via chemotherapy induced senescence in OC.

61

## 62 **Materials and Methods**

### 63 **Chemical Reagents**

64 Compounds purchased from ChemDiv Corporation (San Diego, CA) and ChemBridge  
65 Corporation (San Diego, CA) were >95% pure based on vendor specifications (NMR spectra for  
66 compounds can be found in the supplemental materials). Compound 974 was resynthesized in  
67 the IU Chemical Genomics Core facility, was greater than 99% pure by LC/MS and its structure  
68 validated by NMR.

## 69 **Protein Purification and Enzymatic Assays**

70 Human ALDH1A1, ALDH1A2, and ALDH1A3 were prepared and purified as previously  
71 described[21-24]. Inhibition of ALDH activity by compounds and IC50 curves were determined by  
72 measuring the formation of NAD(P)H spectrophotometrically at 340 nm (molar extinction  
73 coefficient of 6200 M<sup>-1</sup> cm<sup>-1</sup>) on the Beckman DU-640 as well as a Spectramax 340 PC  
74 spectrophotometer using purified recombinant enzyme. Reaction components for assays with  
75 ALDH1A enzymes consisted of 100-200 nM enzyme, 200 μM NAD<sup>+</sup>, 100 μM propionaldehyde,  
76 and 1% DMSO in 25 mM BES buffer, pH 7.5. All assays were performed at 25 °C and were  
77 initiated by addition of substrate after a 2 min incubation period. Purification of and reaction  
78 conditions for other ALDH isoenzymes were as described in[25] . IC50 curves were collected for  
79 compounds which substantially inhibited ALDH1A activity at 20 μM compound. Data were fit to  
80 the four parameter EC50 equation using SigmaPlot (v14), and the values represent the  
81 mean/SEM of three independent experiments (n = 3).

82

## 83 **X-ray Crystallography**

84 All proteins used for crystallography were stored at -20 °C in 50 % (v/v) glycerol. Before use,  
85 proteins were dialyzed exhaustively against 10 mM ACES, 1 mM DTT, pH 6.6 buffer at 4°C.  
86 Crystals were grown using the sitting drop geometry at 20°C with crystallization solutions  
87 comprised of 100 mM BisTris pH 6.1-6.4, 9-11 % PEG3350 (Hampton Research, Catalog No.  
88 HR2-591), 200 mM NaCl, and 5 mM YbCl<sub>3</sub>. The complex with CM38 was made by soaking apo-  
89 enzyme crystals for 5 hours in the crystallization solution to which 500 μM compound in 2% DMSO  
90 (v/v) and 1 mM NAD<sup>+</sup> had been added. The crystals were cryo-protected using 20 % ethylene  
91 glycol (v/v) in the same ligand soaking solution. Crystals were screened for diffraction on a Bruker  
92 X8 Prospector system. Diffracting crystals were stored in liquid nitrogen for transport to the  
93 synchrotron source. Diffraction data was collected at Beamline 19-ID of the Advanced Photon  
94 Source (Argonne National Laboratory, Chicago, IL). Data was integrated and scaled with the

95 HKL3000 software suite. Rigid body, restrained TLS refinement and structure validation were  
96 performed using PHENIX (v1.17, 2-4). Modeling and visualization were performed using Coot  
97 (v0.8.9.2, 5) within PHENIX installation and PyMol v0.99 (DeLano Scientific LLC, San Francisco,  
98 CA).

99

## 100 **Cell culture**

101 High grade serous ovarian cancer ovarian cancer cell lines OVCAR3, OVCAR5, OVSAHO and  
102 OVCAR8 were obtained from ATCC. OVCAR5 cell line was maintained in DMEM (Gibco, Catalog  
103 number: 11965092) with 10% FBS. All other cell lines were maintained in RPMI (Gibco, Catalog  
104 no. 11875135) with 10% FBS, 10ml of 100mM sodium pyruvate (Thermo Fisher, Catalog No.  
105 11360070) and antibiotic-antimycotic (Thermo Fisher, Catalog No. 15240062). Cell lines were  
106 tested every 6 months for mycoplasma contamination using Mycoalert kit (Lonza, Catalog No.  
107 LT07-318).

108

## 109 **Flow cytometry**

110 ALDH activity in live cells was measured by ALDEFLUOR Assay (Stem Cell Technologies,  
111 Catalog No. 01700) as per the manufacturer's protocol. Percentage of ALDH+ cells was  
112 determined by LSRII flow cytometer (BD Biosciences), using 488 nm excitation and the signal  
113 was detected using the 530/30 filter. ALDH+ percentage gate was determined by sample specific  
114 negative control, Diethylamino benzaldehyde (DEAB)/ ALDH+ gate. CD133 was detected by flow  
115 cytometry using fluorescent-labelled antibody CD133/2-PE (Miltenyi Biotec, Catalog No. 130-120-  
116 145) in LSRII flow cytometer using the filter 582/15. For each experiment, 10,000 events were  
117 analyzed. Flow cytometry data were collected using FACSDiva softw

118 are (BD Biosciences) and analyzed using FlowJo software (FlowJo LLC).

119

## 120 **Quantitative PCR**

121 RNA was isolated from cultured cells using RNeasy Mini Kit (Qiagen, Catalog No. 74104)  
122 following the manufacturer's protocol. Nanodrop (ThermoFisher scientific) was used to determine  
123 RNA concentrations. qPCR was performed using Lightcycler 480 Kit (Roche Diagnostics, Catalog  
124 No. 04707516001) as described previously [17]. All gene expression data were normalized to  
125 human EEF1A1. Primer sequences are provided in Supplementary Table 2.

126

## 127 **Senescence Beta ( $\beta$ )-gal assay**

128 Treated cells were stained for senescence-associated  $\beta$ -galactosidase activity according to  
129 manufacturer's protocol (Cell Signaling Technology, Catalog No. 9860). The senescent cells were  
130 quantified by counting stained cells from five independent fields and percentage was calculated  
131 based on total number of cells in each field. Alternatively, percentage of senescence-associated  
132  $\beta$ -galactosidase cells was determined by flow cytometry using SPiDER- $\beta$ -Gal (Dojindo, Catalog  
133 No. SG-04) according to manufacturer's protocol.

134

## 135 **RNA sequencing and bioinformatic analysis**

136 OVCAR3 cells were treated with compound 974 (5  $\mu$ M or DMSO for 48h in biological triplicates  
137 and total RNA was isolated using RNeasy Mini Kit (Qiagen, Catalog No. 74104) according to the  
138 manufacturer's protocol. RNA-sequencing was performed essentially as we have described  
139 previously [26]. The RNA-seq results are available for download at Gene Expression Omnibus  
140 (GEO) data repository at the National Center for Biotechnology Information (NCBI) under the  
141 accession number GSE200641. See Supplementary Materials for a detailed description and  
142 bioinformatic analysis.

143



#### 144 **Mouse xenograft experiment**

145 All mouse experiments were performed according to ethical guidelines approved by the  
146 Institutional Animal Care and Use Committee of Indiana University (Bloomington, IN). For the  
147 limiting dilution analysis,  $10^6$ ,  $10^5$  or  $10^6$  OVCAR3 cells of indicated conditions were mixed with  
148 Matrigel (Corning, Catalog No. CLS356234) at a 1:1 ratio and injected subcutaneously into right  
149 flanks of NOD SCID Gamma (NSG) mice. Tumor size was measured every week with a caliper  
150 and volume was calculated as  $\frac{1}{2} * L * W^2$ . At the end of the study, tumors were collected and  
151 dissociated using Tumor Dissociation Kit (Miltenyi Biotec, Catalog No.130-095-929) and a  
152 gentleMACS dissociator as per manufacturer's protocol.

153

#### 154 **Colony formation and tumorsphere assay**

155 Cells at a 60-70% confluence in a 6-cm plate were treated for indicated times with the inhibitors.  
156 The cells were then collected by trypsinization and were plated as triplicates at a density of 500  
157 cells/well in 24-well ultra-low adherent plates (Corning, Catalog No. 3473) with 1 mL of stem cell  
158 medium as described previously in [18] for spheroid formation assay or 6-well plates in 2-mL  
159 RPMI media with 10% FBS (for colony formation assay). Cells were allowed to grow for 7-14 days  
160 for spheroid formation or 5-7 days for colony formation. Spheroid size and morphology were  
161 assessed using a Zeiss Axiovert 40 inverted microscope with Axio-Vision software (Carl Zeiss  
162 Microimaging). Spheres larger than 10mm were counted under the microscope. Colonies were  
163 stained with 0.5% crystal violet and those with >50 cells were counted.

164

#### 165 **MTT Cell proliferation assay**

166 Cells were collected after inhibitor treatments by trypsinization and then were seeded at a density  
167 of 2000 cells per well in 96-well plates and 3-(4,5-dimethylthiazol-2-yl)-2,5-diphenyl tetrazolium  
168 bromide (MTT; Thermo Fisher Scientific, Catalog No. M6494) assay was performed at day as  
169 described previously[27].  $IC_{50}$  values were calculated using Prism 7(GraphPad Software).

170

### 171 **Cell transfection and plasmids**

172 100,000 OVCAR3 cells were transfected with shControl (Sigma-Aldrich, MISSION shRNA  
173 lentiviralSHC001V) or shALDH1A1(Sigma-Aldrich, MISSION shRNA lentiviralTRCN0000026415,  
174 TRCN0000026498,) as described in [18].

175

### 176 **Statistical analysis**

177 All data are presented as mean values +/- SEM of at least three biological experiments unless  
178 otherwise indicated. Student t test was used to analyze the significant difference among different  
179 groups since the variation within the groups were similar. GraphPad Prism 7 software was used  
180 for data analysis and plotting.

181

### 182 **Data Availability**

183 The data generated in this study are available within the article and its supplementary data files.  
184 The RNA-seq data generated in the study are publicly available in Gene Expression Omnibus  
185 (GEO) under the accession number GSE200641.

186

## 187 **Results**

### 188 **Discovery of 974, a novel ALDH1A1 specific small molecule inhibitor**

189 Compound 974 (974) is an ALDH1A1 specific small molecule inhibitor identified by  
190 screening compounds with high structural similarity to CM38, the lead compound identified from  
191 a high throughput screen [25]. CM38 showed good structural characteristics as a lead compound,  
192 with a low molecular weight of 294 kDa and an approximate ClogP of 2.8. To investigate the  
193 nature of the interactions that define inhibition in this series of compounds, we determined the  
194 structure of ALDH1A1 in a complex with both NAD and CM38 by X-ray crystallography to a

195 resolution of 1.8 Å (**Supplementary Table S1**, PDB ID: 7UM9). The structure of CM38 bound to  
196 ALDH1A1 showed that CM38 bound within the substrate binding pocket of the enzyme  
197 (**Supplementary Fig. S1A**). CM38 was then screened for ALDH inhibition using nine ALDH  
198 isoenzymes at 20 µM and showed excellent selectivity for ALDH1A1 over the other, highly similar  
199 isoenzymes in the ALDH subfamily (**Supplementary Fig. S1B**). CM38 was found to be  
200 uncompetitive with respect to varied NAD<sup>+</sup>, which confirms that it does not bind the cofactor-  
201 binding site (**Supplementary Fig. S1C**). There was no significant time-dependency in its ability  
202 to inhibit ALDH1A1, suggesting the interaction is non-covalent.

203 To avoid the potential off-target effects due to the structure of CM38, 974 was chosen  
204 amongst ALDH1A1 inhibitor with high structural similarity to CM38 from commercial sources  
205 (ChemDiv Corporation and ChemBridge Corporation). The structure of 974 is shown in (**Fig. 1A**).  
206 Further details about discovery and characterization of 974 are described in supplementary  
207 methods. 974 is a highly potent inhibitor that blocks ALDH1A1 activity with an IC<sub>50</sub> of 470nM  
208 (**Fig. 1B**). 974 doses chosen for the rest of the study were lower than the IC<sub>50</sub> doses for OVCAR3  
209 and OVCAR5 cells (**Fig. 1C**).

210

### 211 **ALDH1A1 inhibition suppresses stemness phenotypes ovarian cancer cells**

212 To test the effect of 974 on cellular ALDH enzyme activity, we performed ALDEFLUOR  
213 assays in HGSOV cell lines. 974 significantly reduced the percentage of ALDH positive cells in  
214 OVCAR3 (**Fig. 2A**) and OVCAR5 (**Fig. 2B**). The gating strategy for flow cytometry analysis for  
215 ALDEFLUOR assay is shown in (**Supplementary Fig. S2A**). The dose of 974 was chosen based  
216 on a dose-response study (**Supplementary Fig. S2B**). At the doses tested, 974 had no effect on  
217 the proliferation of ovarian cancer cells in monolayer (**Supplementary Fig. S2C**). At the doses of  
218 974 selected for further study, the compound did not induce apoptosis, indicated by PI/Annexin V  
219 staining (**Supplementary Fig. S2D**).

220 Numerous genes associated with stemness have been reported to be characteristics of  
221 OCSCs [28, 29]. 974 significantly decreased expression of well-known stemness genes Bmi-1,  
222 Nanog, Oct4, and Sox2 in OVCAR3 (**Fig. 2C**) and OVCAR5 (**Fig. 2D**). To measure the self-  
223 renewal ability of the CSC subpopulations, the spheroid formation assay was used. Spheroid  
224 formation ability of OVCAR3 (**Fig. 2E**) and OVCAR5 (**Fig. 2F**) was significantly inhibited by 974  
225 treatment, and clonogenic survival of both cell lines was also significantly inhibited by treatment  
226 with 974 (**Fig. 2. G, H**). To determine if the effects of 974 were specific to ALDH1A1-mediated  
227 stemness, we used OVCAR8 cells, which do not have detectable ALDH activity but do have a  
228 CD133+ stem cell population (**Supplementary Fig. S3A**). 974 treatment did not alter clonogenic  
229 growth or spheroid formation in OVCAR8 (**Supplementary Fig. S3B-D**). Treatment with 974 also  
230 did not alter the percentage of CD133 cells in OVCAR8 (**Supplementary Fig. S3A**).

231 To determine if genetically reducing ALDH1A1 levels had similar effects on stemness  
232 properties as drug treatment, we developed stable 2 independent shRNA mediated ALDH1A1  
233 knockdown (shALDH1A1\_1 and shALDH1A1\_2) and scrambled control (shControl) OVCAR3 cell  
234 lines (**Supplementary Fig. S4A**). ALDH1A1 knockdown significantly decreased the percent  
235 ALDH+ cells, spheroid, and colony formation compared to shControl (**Supplementary Fig. S4B-**  
236 **D**), similar to what was observed by 974 treatment. To test the specificity of 974 to ALDH1A1 in  
237 cells, shALDH1A1 and shControl cells were treated with 974 and ALDEFLUOR assay was  
238 performed. 974 did not further reduce the percentage of ALDH+ cells in shALDH1A1 cells  
239 (**Supplementary Fig. S5**).

240

#### 241 **ALDH1A1 inhibition suppresses ovarian cancer stemness in vivo**

242 To test whether 974 treatment blocks tumor initiation *in vivo*, a limiting dilution analysis  
243 (LDA) was performed. OVCAR3 cells were pretreated with 974 (5 $\mu$ M) or DMSO for 48 hours and  
244 1 million, 100,000 or 10,000 treated cells were injected subcutaneously (s.c.) into NSG mice and  
245 tumor formation was monitored (**Fig. 3A**). Treatment with 974 significantly reduced CSC

246 frequency in mice (**Fig. 3B**). Complementary to the study using 974 and to examine the  
247 requirement for ALDH1A1 in this context, shALDH1A1 or shControl cells (1 million, 100,000 or  
248 10,000) were injected s.c in NSG mice. The results of the LDA demonstrated a significant  
249 reduction in CSC frequency (**Fig. 3C**). The log fraction plot was generated using the LDA software  
250 for the 974(or DMSO) study as well as the shALDH1A1(or shControl) study (**Fig. 3D, E**). The  
251 slope of the solid line represents the log-active cell (CSC) fraction. The 95% confidence interval  
252 is shown by the dotted lines. At the end of the study, tumors were collected and analyzed for  
253 percentage of ALDH+ cells by ALDEFLUOR assay. The tumors from mice injected with  
254 shALDH1A1 cells had significantly lower percentage of ALDH+ cells compared to the tumors from  
255 shControl injected mice (**Fig. 3F**). Collectively, these data demonstrate that ALDH1A1 is essential  
256 for maintenance of stemness in ovarian cancer cells and 974 significantly inhibits stemness  
257 phenotypes.

258

### 259 **ALDH1A1 inhibition downregulates key stemness and chemoresistance pathways**

260 To determine the effect of ALDH1A1 inhibition by 974 on gene expression, transcriptomic  
261 analysis of 974 or DMSO treated cells was carried out using RNA-seq and bioinformatic analysis.  
262 The volcano plot shows that 1630 genes were downregulated, and 1140 genes upregulated by  
263 ALDH1A1 inhibition (**Fig. 4A**, 974 vs. DMSO treated samples; FDR<0.05). Genes significantly  
264 downregulated by ALDH1A1 inhibition included stem cell markers (CD44, FZD7, SOX9) and  
265 genes involved in chemoresistance (ABCB1, NFκB) in ovarian cancer [9, 30-32] (**Fig. 4B**). In  
266 addition, 974 treatment significantly downregulated senescence biomarkers p21(CDKN1A) and  
267 p15<sup>INK4b</sup> (CDKN2B) and genes associated with the senescence associated secretory phenotype  
268 (SASP) including IL6, IL8, CXCL1, CXCL3 (**Fig. 4B**). Ingenuity Pathway Analysis (IPA) and Gene  
269 Ontology (GO) annotations of the differentially expressed genes demonstrated that 974 treatment  
270 inhibited a number of key biological processes associated with tumor initiation and stem cells,  
271 including growth of solid tumor, inflammatory response, cells movement of cancer cells,

272 development of epithelial tissues and drug resistance of tumor cells (red and green colors  
273 represent upregulated or downregulated genes respectively), supporting the role of ALDH1A1 in  
274 modulating OCSC biology (**Fig. 4C**). IPA of genes significantly decreased by 974 treatment  
275 revealed altered xenobiotic metabolism signaling, cancer drug efflux, IL6 and NF $\kappa$ B signaling (**Fig.**  
276 **4D, Supplementary Table S4**), all of which have been reported to play a role in stemness and  
277 chemoresistance[18, 33, 34]; furthermore, the cellular senescence pathway was significantly  
278 downregulated by 974 treatment (**Fig. 4D**). Collectively, these results demonstrated that  
279 ALDH1A1 inhibition led to reduction in gene expression in stemness and chemoresistance related  
280 pathways in OC.

#### 281 **Inhibition of ALDH1A1 suppresses chemotherapy induced senescence and stemness**

282 Senescence is the cellular state characterized by proliferative arrest, resistance to  
283 apoptosis and altered expression of genes encoding cytokines and other growth factors,  
284 commonly known as SASP[35]. SASP has pro-tumorigenic paracrine effects, and emerging  
285 evidence supports the role of the SASP in the induction of cancer stemness and relapse [14, 20].  
286 Because platinum-based chemotherapy has been shown to enhance SASP and subsequently  
287 stemness in ovarian cancer [20], we investigated the effect of ALDH1A1 inhibition on senescence  
288 in cisplatin (CDDP)-treated cells. Treatment with 974 suppressed CDDP-induced senescence  
289 associated beta galactosidase (SA- $\beta$  gal) staining in OVCAR3 (**Fig. 5A, B**). 974 treatment also  
290 significantly reduced basal and CDDP-induced expression of senescence marker p21 (CDKN1A)  
291 in OVCAR3 (**Fig. 5C**) and SASP gene expression in OVCAR3 and OVCAR5 (**Fig. 5C;**  
292 **Supplementary Fig. S6A**). Additionally, 974 significantly inhibited SASP gene expression in  
293 CDDP-resistant OVCAR5 cells with high ALDH activity, developed by repeated cycles of  
294 exposure to CDDP (**Supplementary Fig. S6B-D, Supplementary Methods**). The effect of  
295 ALDH1A1 inhibition on senescence phenotype was validated by using the shALDH1A1 cells.

296 ALDH1A1 knockdown significantly suppressed basal and CDDP-induced senescence measured  
297 as percentage of  $\beta$ -gal positive cells (**Fig. 5D**). ALDH1A1 knockdown suppressed the basal and  
298 CDDP-induced expression of p21 and SASP genes, including IL6, IL8, CXCL1 and CXCL3 (**Fig.**  
299 **5E**).

300 CDDP induces stemness in ovarian cancer cells and treatment with 974 abrogated CDDP-  
301 induced stemness phenotype in spheroid assays (**Fig. 5F**), suggesting a link between  
302 senescence and stemness. To confirm that blocking senescence reduced stemness, ovarian  
303 cancer cells were treated with ABT-263, a senolytic agent (Navitoclax; 2 $\mu$ M for 24h). ABT-263  
304 treatment reduced basal and CDDP-induced spheroid numbers (**Supplementary Fig. S6C**).

305

## 306 **Discussion**

307 Ovarian cancer is a deadly disease attributed to late-stage detection as well as relapse  
308 and development of chemoresistance. Strategies to overcome chemoresistance are needed to  
309 achieve better prognosis in ovarian cancer patients. OCSCs have been shown to cause  
310 chemoresistance[17], thus targeting this population in conjunction with conventional  
311 chemotherapy could be an effective strategy in preventing relapse. This study describes the  
312 discovery and characterization of compound 974, a novel small molecule inhibitor selective to  
313 ALDH1A1 over other ALDH isoforms. We show that 974 inhibits stemness phenotypes in HGSOC  
314 cell lines, blocks expression of putative stemness genes and pathways, reduces OCSC frequency  
315 and delays tumor initiation *in vivo*. Importantly, inhibition of ALDH1A1 by 974 suppresses  
316 platinum-based chemotherapy induced senescence and stemness and to our knowledge this is  
317 the first report that ALDH1A1 regulates senescence-mediated stemness. Overall, our findings  
318 support the use of small molecule inhibitors of ALDH1A1 as a promising therapeutic approach to  
319 target OCSC and prevent chemoresistance.

320

321 ALDH1A1 is a robust marker for CSCs in ovarian and other cancers [12, 36] and ALDH1A1  
322 expression in patient tumors predicts poor prognosis[11, 37]. Several inhibitors have been  
323 designed to target CSCs by selective inhibition of ALDH1A1 or by a pan-ALDH1A inhibition  
324 approach. Pan-ALDH1A inhibitor 673A causes cell death by necroptosis in OCSCs, reduces  
325 tumor initiation and is highly synergistic with chemotherapy[38]. Pan-ALDH1A inhibitor has the  
326 advantage of overcoming resistance that arises from compensation due to different ALDH  
327 isoforms. However, targeting ALDH1A1 selectively could have a unique advantage from safety  
328 perspective since ALDH1A1 has been shown to be dispensable for stem cell function in mice [39].  
329 Moreover, ALDH1A2 expression is essential for dendritic cell differentiation in bone marrow  
330 microenvironment [40].

331  
332 By targeting a novel scaffold in ALDH1A1, 974 acts an effective tool for understanding  
333 ALDH1A1 function. We show that 974 is specific to ALDH1A1 by demonstrating no change in  
334 stemness when treating a low ALDH1A1 expression cell line with 974 (OVCAR8 cells;  
335 **Supplementary Fig. S3 A-D**). Moreover, when ALDH1A1 is biologically inhibited using a  
336 knockdown, 974 can no longer inhibit ALDH activity (**Supplementary Fig. S5**). The effects are in  
337 line with the published reports of other ALDH1A1 specific inhibitors CM37[13] and NCT-501[41].  
338 The data on ALDH1A1 inhibition using CM37 and NCT-501 support our findings that ALDH1A1  
339 is essential to maintain CSC phenotypes. CM37 inhibited spheroid formation and expression of  
340 stemness genes such as Sox2, Nanog, Oct4 as well as p21 similar to 974[13]. NCT-501 inhibits  
341 ALDH activity and attenuates de-differentiation of non-CSC into CSCs in ovarian cancer cells[41].  
342 Indirect targeting of ALDH1A1 includes therapies that target upstream ALDH1A1 regulators of  
343 such as BRD4[42] or HOTAIR[43] thereby inhibiting the expression of ALDH1A1 which leads to  
344 inhibition of stemness. Although 974 is not yet formulated as an in vivo therapeutic, we provide  
345 compelling evidence using ovarian cancer cells treated with 974 in vitro for LDA as support for  
346 future rational chemistry design strategies to improve 974 bioavailability and targeting CSC in



347 vivo. Our ongoing efforts aim at targeting the “arms” that extend from the central scaffold to  
348 improve the metabolic stability and modify the lipophilicity of the compound.

349  
350 ALDH1A1 is a ubiquitous enzyme with several cellular functions such as conversion of  
351 aldehydes into carboxylic acids, scavenging ROS, altering signaling through modulation of  
352 retinoic acid pathway[12]. Thus, how ALDH1A1 regulates cancer stemness could involve more  
353 than one mechanism. Through transcriptomic analysis, our study reveals a previously unknown  
354 mechanism of stemness regulation by ALDH1A1 via the senescence pathway. Senescence,  
355 initially thought to be a tumor suppressive mechanism, has recently been shown to promote  
356 stemness in ovarian[20] and other cancers[16]. Senescent cells exhibit a complex secretome  
357 known as SASP that promotes stemness via paracrine signaling [20]. Specifically, IL-6 signaling  
358 axis was shown to be upregulated by neo-adjuvant chemotherapy[44]. We demonstrate that  
359 ALDH1A1 inhibition blocks the senescence and SASP induced by cisplatin treatment (Figure 5),  
360 possibly by suppressing the NFκB pathway (Figure 4D). NFκB regulates several of the SASP  
361 factors[36], and inhibiting NFκB attenuates stemness in OC[45]. Further investigation is required  
362 to elucidate the exact mechanism by which ALDH1A1 regulates cisplatin-induced stemness.

363  
364 In conclusion, using 974 as a tool, we have demonstrated the functional significance of  
365 ALDHA1 in maintaining ovarian cancer stemness *in vitro* and *in vivo* models. To our knowledge,  
366 this is the first study that demonstrates that ALDH1A1 is involved in regulation of senescence and  
367 SASP. ALDH1A1 regulation of senescence could be significant because standard of care  
368 treatment for ovarian cancer includes platinum-based chemotherapy, and carboplatin has been  
369 shown to induce senescent cells in ovarian cancer tumors[46, 47]. We show that a new isoform-  
370 specific ALDH1A1 inhibitor suppresses chemotherapy-induced senescence as well as stemness.  
371 Targeting ALDH1A1 in combination with chemotherapy could block senescence and inhibit CSC  
372 enrichment to overcome resistance and improve outcomes for ovarian cancer patients.

## 373 **Conclusion**

374 Here we describe the , a new specific and potent small molecule inhibitor  
375 for ALDH1A1 in ovarian cancer models enriched in cells with stemness  
376 characteristics. Together with siRNA-mediated knockdown of the  
377 enzyme, the results obtained using CM37 provide proof of principle  
378 supporting the role of ALDH1 in cancer stemness. Our data demonstrate  
379 that by fine tuning the levels of intracellular oxidative stress, ALDH1A1,  
380 protects cancer cells from DNA damage, enhancing spheroid  
381 proliferation and tumorigenicity.  
382

383

## 384 **Acknowledgements**

We thank Christiane Hassel (Flow Cytometry Core Facility, Indiana University, Bloomington, IN) for technical assistance with flow cytometry. We would like to thank the Center for Genomics and Bioinformatics at Indiana University, Bloomington, for their assistance with RNA-seq experiments, especially Jie Huang for library construction and sequencing. This project was funded with support from the Indiana Clinical and Translational Sciences Institute funded, in part by Grant Number UL1TR002529 from the National Institutes of Health, National Center for Advancing Translational Sciences, Clinical and Translational Sciences Award; and through the IU Simon Comprehensive Cancer Center P30 Support Grant (P30CA082709-20).

## 385 **References**

- 386
- 387 1. Torre, L.A., et al., *Ovarian cancer statistics, 2018*. *CA Cancer J Clin*, 2018. **68**(4): p.  
388 284-296.
  - 389 2. Sung, H., et al., *Global Cancer Statistics 2020: GLOBOCAN Estimates of Incidence and*  
390 *Mortality Worldwide for 36 Cancers in 185 Countries*. *CA Cancer J Clin*, 2021. **71**(3): p.  
391 209-249.
  - 392 3. Kurman, R.J. and M. Shih Ie, *The Dualistic Model of Ovarian Carcinogenesis: Revisited,*  
393 *Revised, and Expanded*. *Am J Pathol*, 2016. **186**(4): p. 733-47.
  - 394 4. Davis, A., A.V. Tinker, and M. Friedlander, *"Platinum resistant" ovarian cancer: what is*  
395 *it, who to treat and how to measure benefit?* *Gynecol Oncol*, 2014. **133**(3): p. 624-31.
  - 396 5. Steg, A.D., et al., *Stem cell pathways contribute to clinical chemoresistance in ovarian*  
397 *cancer*. *Clin Cancer Res*, 2012. **18**(3): p. 869-81.

- 398 6. Al-Alem, L.F., et al., *Ovarian cancer stem cells: What progress have we made?* Int J  
399 Biochem Cell Biol, 2019. **107**: p. 92-103.
- 400 7. Dean, M., T. Fojo, and S. Bates, *Tumour stem cells and drug resistance*. Nat Rev Cancer,  
401 2005. **5**(4): p. 275-84.
- 402 8. Baba, T., et al., *Epigenetic regulation of CD133 and tumorigenicity of CD133+ ovarian*  
403 *cancer cells*. Oncogene, 2009. **28**(2): p. 209-18.
- 404 9. Zhang, S., et al., *Identification and characterization of ovarian cancer-initiating cells*  
405 *from primary human tumors*. Cancer Res, 2008. **68**(11): p. 4311-20.
- 406 10. Yu, S., et al., *Therapeutic Targeting of Tumor Cells Rich in LGR Stem Cell Receptors*.  
407 Bioconjug Chem, 2021. **32**(2): p. 376-384.
- 408 11. Landen, C.N., Jr., et al., *Targeting aldehyde dehydrogenase cancer stem cells in ovarian*  
409 *cancer*. Mol Cancer Ther, 2010. **9**(12): p. 3186-99.
- 410 12. Muralikrishnan, V., T.D. Hurley, and K.P. Nephew, *Targeting Aldehyde Dehydrogenases*  
411 *to Eliminate Cancer Stem Cells in Gynecologic Malignancies*. Cancers (Basel), 2020.  
412 **12**(4).
- 413 13. Nwani, N.G., et al., *A Novel ALDH1A1 Inhibitor Targets Cells with Stem Cell*  
414 *Characteristics in Ovarian Cancer*. Cancers (Basel), 2019. **11**(4).
- 415 14. Milanovic, M., Y. Yu, and C.A. Schmitt, *The Senescence-Stemness Alliance - A Cancer-*  
416 *Hijacked Regeneration Principle*. Trends Cell Biol, 2018. **28**(12): p. 1049-1061.
- 417 15. Herranz, N. and J. Gil, *Mechanisms and functions of cellular senescence*. J Clin Invest,  
418 2018. **128**(4): p. 1238-1246.
- 419 16. Milanovic, M., et al., *Senescence-associated reprogramming promotes cancer stemness*.  
420 Nature, 2018. **553**(7686): p. 96-100.
- 421 17. Wang, Y., et al., *Epigenetic targeting of ovarian cancer stem cells*. Cancer Res, 2014.  
422 **74**(17): p. 4922-36.
- 423 18. Wang, Y., et al., *IL-6 mediates platinum-induced enrichment of ovarian cancer stem*  
424 *cells*. JCI Insight, 2018. **3**(23).
- 425 19. Chambers, C.R., et al., *Overcoming the senescence-associated secretory phenotype*  
426 *(SASP): a complex mechanism of resistance in the treatment of cancer*. Mol Oncol, 2021.  
427 **15**(12): p. 3242-3255.
- 428 20. Nacarelli, T., et al., *NAMPT Inhibition Suppresses Cancer Stem-like Cells Associated*  
429 *with Therapy-Induced Senescence in Ovarian Cancer*. Cancer Res, 2020. **80**(4): p. 890-  
430 900.
- 431 21. Hammen, P.K., et al., *Multiple conformations of NAD and NADH when bound to human*  
432 *cytosolic and mitochondrial aldehyde dehydrogenase*. Biochemistry, 2002. **41**(22): p.  
433 7156-68.
- 434 22. Parajuli, B., et al., *Discovery of novel regulators of aldehyde dehydrogenase isoenzymes*.  
435 Chem Biol Interact, 2011. **191**(1-3): p. 153-8.
- 436 23. Parajuli, B., et al., *Development of selective inhibitors for human aldehyde*  
437 *dehydrogenase 3A1 (ALDH3A1) for the enhancement of cyclophosphamide cytotoxicity*.  
438 Chembiochem, 2014. **15**(5): p. 701-12.
- 439 24. Buchman, C.D. and T.D. Hurley, *Inhibition of the Aldehyde Dehydrogenase 1/2 Family*  
440 *by Psoralen and Coumarin Derivatives*. J Med Chem, 2017. **60**(6): p. 2439-2455.
- 441 25. Morgan, C.A. and T.D. Hurley, *Development of a high-throughput in vitro assay to*  
442 *identify selective inhibitors for human ALDH1A1*. Chem Biol Interact, 2015. **234**: p. 29-  
443 37.

- 444 26. Tang, J., et al., *Epigenetic Targeting of Adipocytes Inhibits High-Grade Serous Ovarian*  
445 *Cancer Cell Migration and Invasion*. Mol Cancer Res, 2018. **16**(8): p. 1226-1240.
- 446 27. Fang, F., et al., *The novel, small-molecule DNA methylation inhibitor SGI-110 as an*  
447 *ovarian cancer chemosensitizer*. Clin Cancer Res, 2014. **20**(24): p. 6504-16.
- 448 28. Zong, X., et al., *EZH2-Mediated Downregulation of the Tumor Suppressor DAB2IP*  
449 *Maintains Ovarian Cancer Stem Cells*. Cancer Res, 2020. **80**(20): p. 4371-4385.
- 450 29. Connor, E.V., et al., *Thy-1 predicts poor prognosis and is associated with self-renewal in*  
451 *ovarian cancer*. J Ovarian Res, 2019. **12**(1): p. 112.
- 452 30. Wang, Y., et al., *Frizzled-7 Identifies Platinum-Tolerant Ovarian Cancer Cells*  
453 *Susceptible to Ferroptosis*. Cancer Res, 2021. **81**(2): p. 384-399.
- 454 31. Ozes, A.R., et al., *NF-kappaB-HOTAIR axis links DNA damage response,*  
455 *chemoresistance and cellular senescence in ovarian cancer*. Oncogene, 2016. **35**(41): p.  
456 5350-5361.
- 457 32. Raspaglio, G., et al., *Sox9 and Hif-2alpha regulate TUBB3 gene expression and affect*  
458 *ovarian cancer aggressiveness*. Gene, 2014. **542**(2): p. 173-81.
- 459 33. Li, J., et al., *Lipid Desaturation Is a Metabolic Marker and Therapeutic Target of*  
460 *Ovarian Cancer Stem Cells*. Cell Stem Cell, 2017. **20**(3): p. 303-314 e5.
- 461 34. Hirschmann-Jax, C., et al., *A distinct "side population" of cells with high drug efflux*  
462 *capacity in human tumor cells*. Proc Natl Acad Sci U S A, 2004. **101**(39): p. 14228-33.
- 463 35. Campisi, J. and F. d'Adda di Fagagna, *Cellular senescence: when bad things happen to*  
464 *good cells*. Nat Rev Mol Cell Biol, 2007. **8**(9): p. 729-40.
- 465 36. Tomita, H., et al., *Aldehyde dehydrogenase 1A1 in stem cells and cancer*. Oncotarget,  
466 2016. **7**(10): p. 11018-32.
- 467 37. Meng, E., et al., *ALDH1A1 maintains ovarian cancer stem cell-like properties by altered*  
468 *regulation of cell cycle checkpoint and DNA repair network signaling*. PLoS One, 2014.  
469 **9**(9): p. e107142.
- 470 38. Chefetz, I., et al., *A Pan-ALDH1A Inhibitor Induces Necroptosis in Ovarian Cancer*  
471 *Stem-like Cells*. Cell Rep, 2019. **26**(11): p. 3061-3075 e6.
- 472 39. Levi, B.P., et al., *Aldehyde dehydrogenase 1a1 is dispensable for stem cell function in the*  
473 *mouse hematopoietic and nervous systems*. Blood, 2009. **113**(8): p. 1670-80.
- 474 40. Feng, T., et al., *Generation of mucosal dendritic cells from bone marrow reveals a*  
475 *critical role of retinoic acid*. J Immunol, 2010. **185**(10): p. 5915-25.
- 476 41. Cui, T., et al., *DDB2 represses ovarian cancer cell dedifferentiation by suppressing*  
477 *ALDH1A1*. Cell Death Dis, 2018. **9**(5): p. 561.
- 478 42. Yokoyama, Y., et al., *BET Inhibitors Suppress ALDH Activity by Targeting ALDH1A1*  
479 *Super-Enhancer in Ovarian Cancer*. Cancer Res, 2016. **76**(21): p. 6320-6330.
- 480 43. Ozes, A.R., et al., *Therapeutic targeting using tumor specific peptides inhibits long non-*  
481 *coding RNA HOTAIR activity in ovarian and breast cancer*. Sci Rep, 2017. **7**(1): p. 894.
- 482 44. Jordan, K.R., et al., *The Capacity of the Ovarian Cancer Tumor Microenvironment to*  
483 *Integrate Inflammation Signaling Conveys a Shorter Disease-free Interval*. Clin Cancer  
484 Res, 2020. **26**(23): p. 6362-6373.
- 485 45. Gonzalez-Torres, C., et al., *NF-kappaB Participates in the Stem Cell Phenotype of*  
486 *Ovarian Cancer Cells*. Arch Med Res, 2017. **48**(4): p. 343-351.
- 487 46. Uruski, P., et al., *Primary high-grade serous ovarian cancer cells are sensitive to*  
488 *senescence induced by carboplatin and paclitaxel in vitro*. Cell Mol Biol Lett, 2021.  
489 **26**(1): p. 44.

490 47. Saleh, T., et al., *Therapy-Induced Senescence: An "Old" Friend Becomes the Enemy*.  
491 *Cancers (Basel)*, 2020. **12**(4).

492 **Figure 1.**

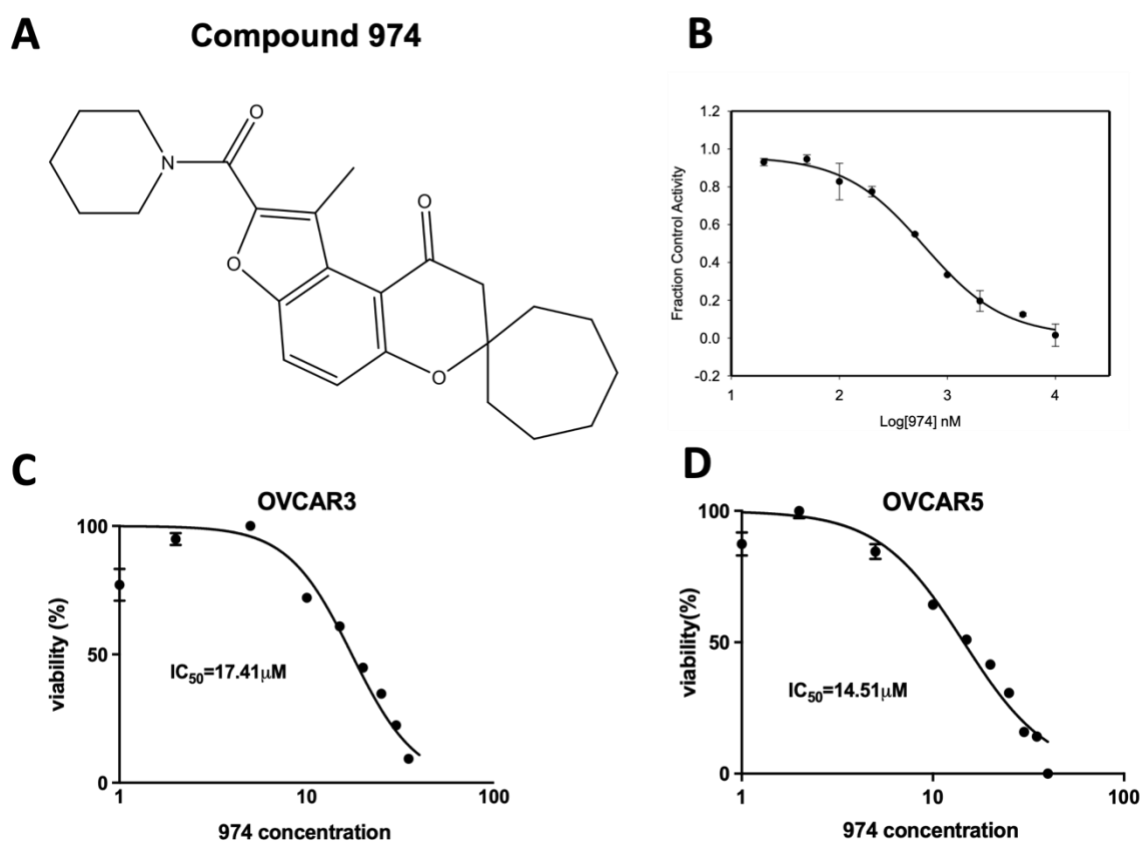

493

494

495 **Figure 1: Compound 974: A novel ALDH1A1 inhibitor.** **A.** Chemical structure of compound  
496 974. **B.** EC50 curve for 974 binding with purified ALDH1A1. **C.** OVCAR3 (left) or OVCAR5  
497 (right) were treated with increasing doses of 974 (0.5-100  $\mu$ M) for 48 hours, and MTT assay was  
498 performed to measure viability. IC<sub>50</sub> values were calculated using GraphPad Prism.

499 **Figure 2**

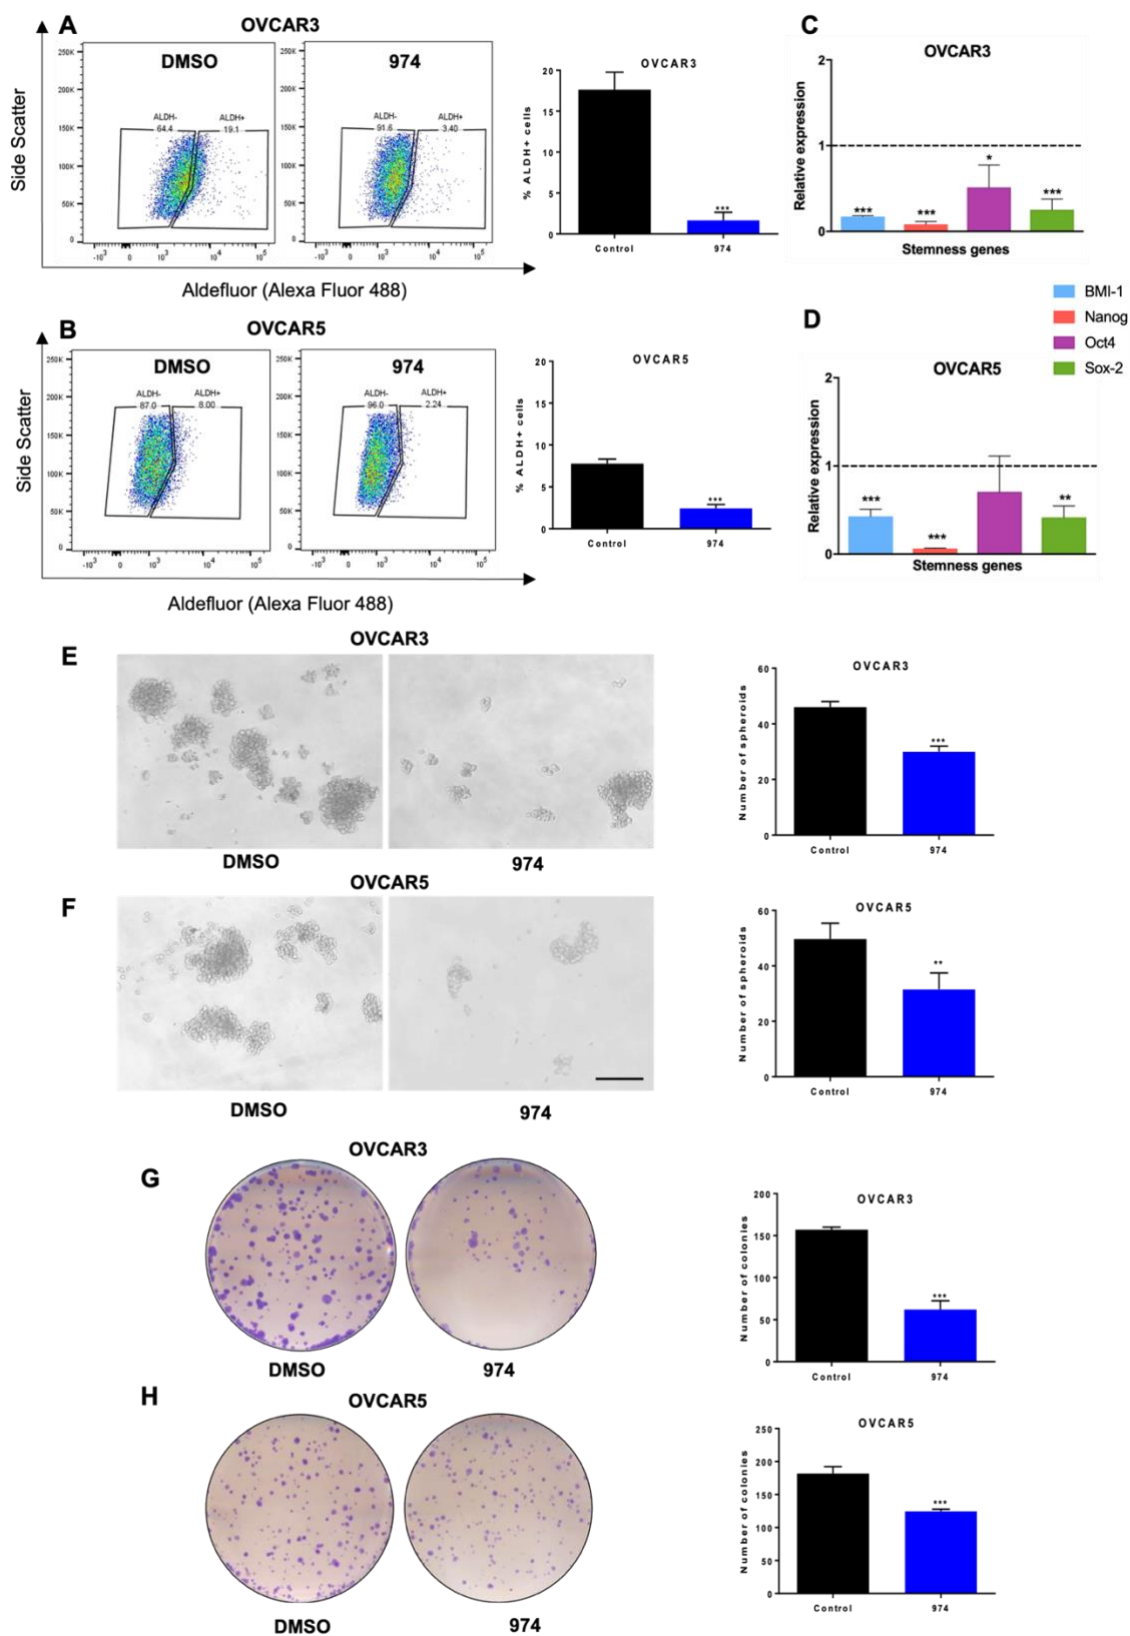

500 **Figure 2. ALDH1A1 inhibition suppresses ovarian cancer stemness phenotypes in vitro.**

501 **A.** OVCAR3 or **B.** OVCAR5 cells were treated with compound 974 (5 $\mu$ M for 48h) or DMSO and  
502 the percentage of ALDH+ cells were measured by ALDEFLUOR assay using flow cytometry (left)  
503 and the results were quantified (right). **C.** OVCAR3 or **D.** OVCAR5 cells were treated as in A and  
504 expression of stemness genes were measured by qPCR. **E.** OVCAR3 or **F.** OVCAR5 cells were  
505 treated as in A. 500 cells/well were replated in 24-well low-adhesion conditions after treatment.  
506 Representative images of spheroid formation after 14 days (left) and quantification (right). **G.**  
507 OVCAR3 or **H.** OVCAR5 were treated as in A. 500 cells/well were replated in 6 well plates after  
508 treatment. Colonies were stained with 0.05% crystal violet and counted. Representative images  
509 of colony formation (left) and quantification (right). Error bars represent SEM; n =3 independent  
510 experiments of triplicate assays. Data are presented as mean  $\pm$  SEM with p < 0.05 (\*), p < 0.01  
511 (\*\*), and p < 0.005 (\*\*\*). Scale bar, 100 $\mu$ m.



512 **Figure 3**

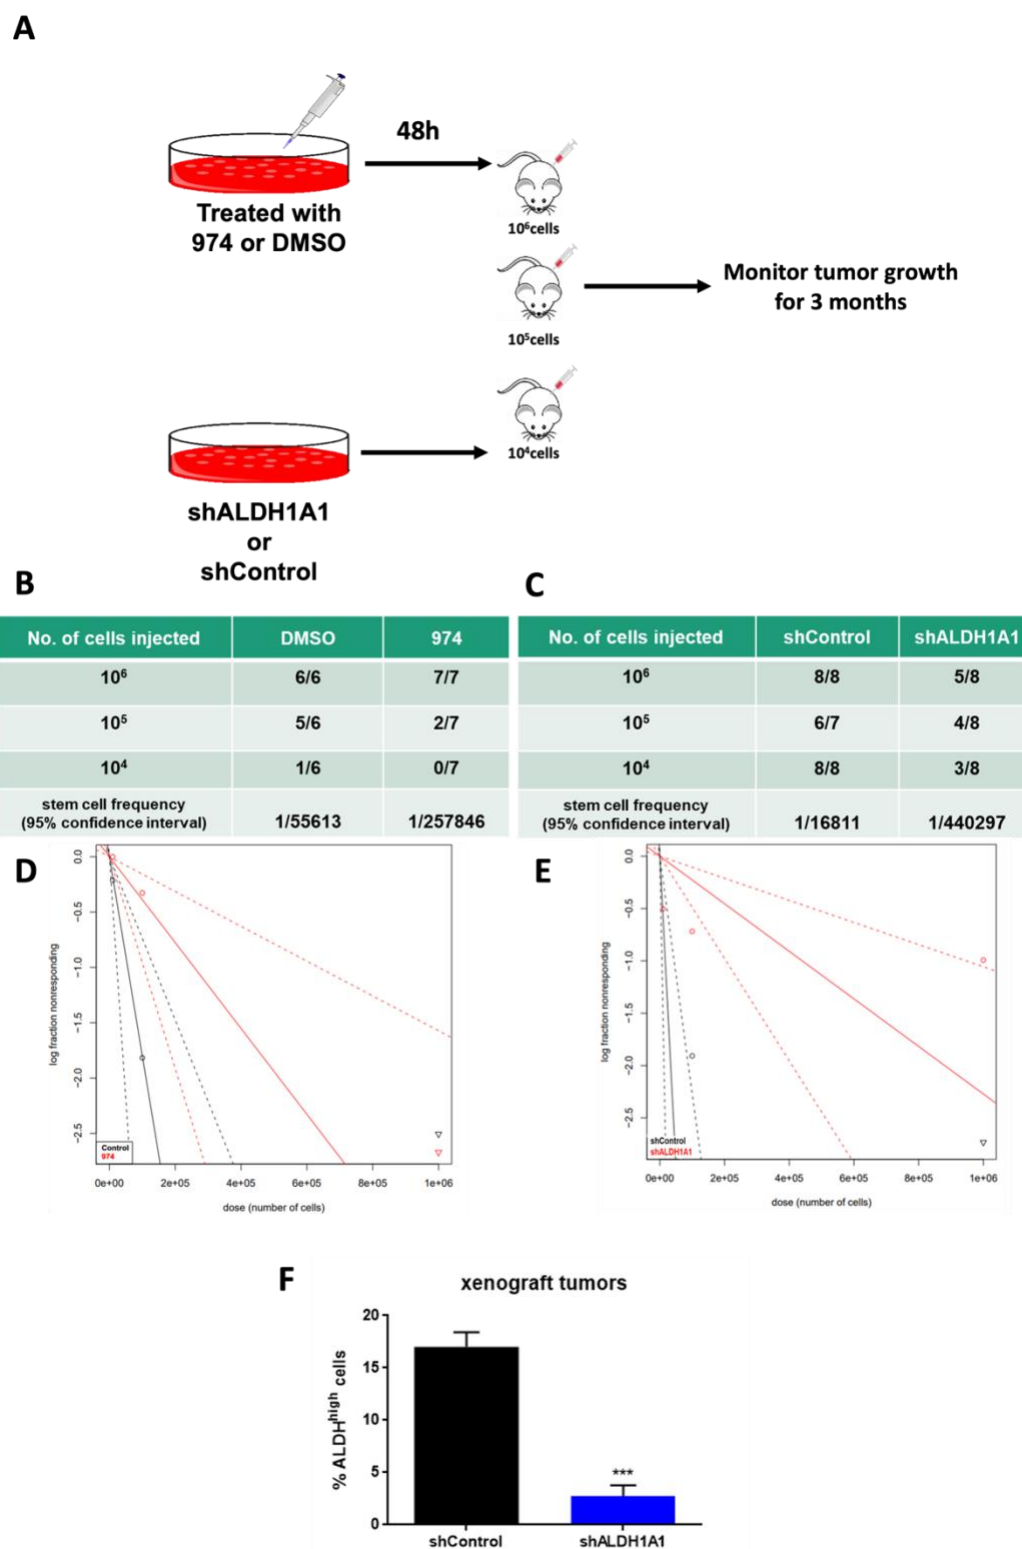

513 **Figure 3. ALDH1A1 inhibition suppresses ovarian cancer stemness in vivo. A.** Schematic  
514 representing study design.  $10^6$ ,  $10^5$  or  $10^4$  OVCAR3 cells treated with compound 974 (5 $\mu$ M for  
515 48h) or DMSO OR shALDH1A1 or shControl cells were injected into NSG mice subcutaneously  
516 and tumor formation was monitored. Numbers of mice with tumors over the total numbers of  
517 mice in the group and CSC frequency calculated by ELDA software  
518 (<https://bioinf.wehi.edu.au/software/elda/>) **B.** For DMSO or 974 treatment **C.** For shControl or  
519 shALDH1A1. Log-fraction plot of limiting dilution analysis for stem cell frequency generated by  
520 extreme limiting dilution analysis in **D.** compound 974 treatment vs DMSO or **E.** shALDH1A1 or  
521 shControl. **F.** Percentage of ALDH+ cells in the dissociated tumors from shALDH1A1 study in C  
522 was measured by ALDEFLUOR assay. Error bars represent SEM; n =3 independent tumor  
523 samples. Data are presented as mean  $\pm$  SEM with  $p < 0.005$  (\*\*\*)).

524 **Figure 4**

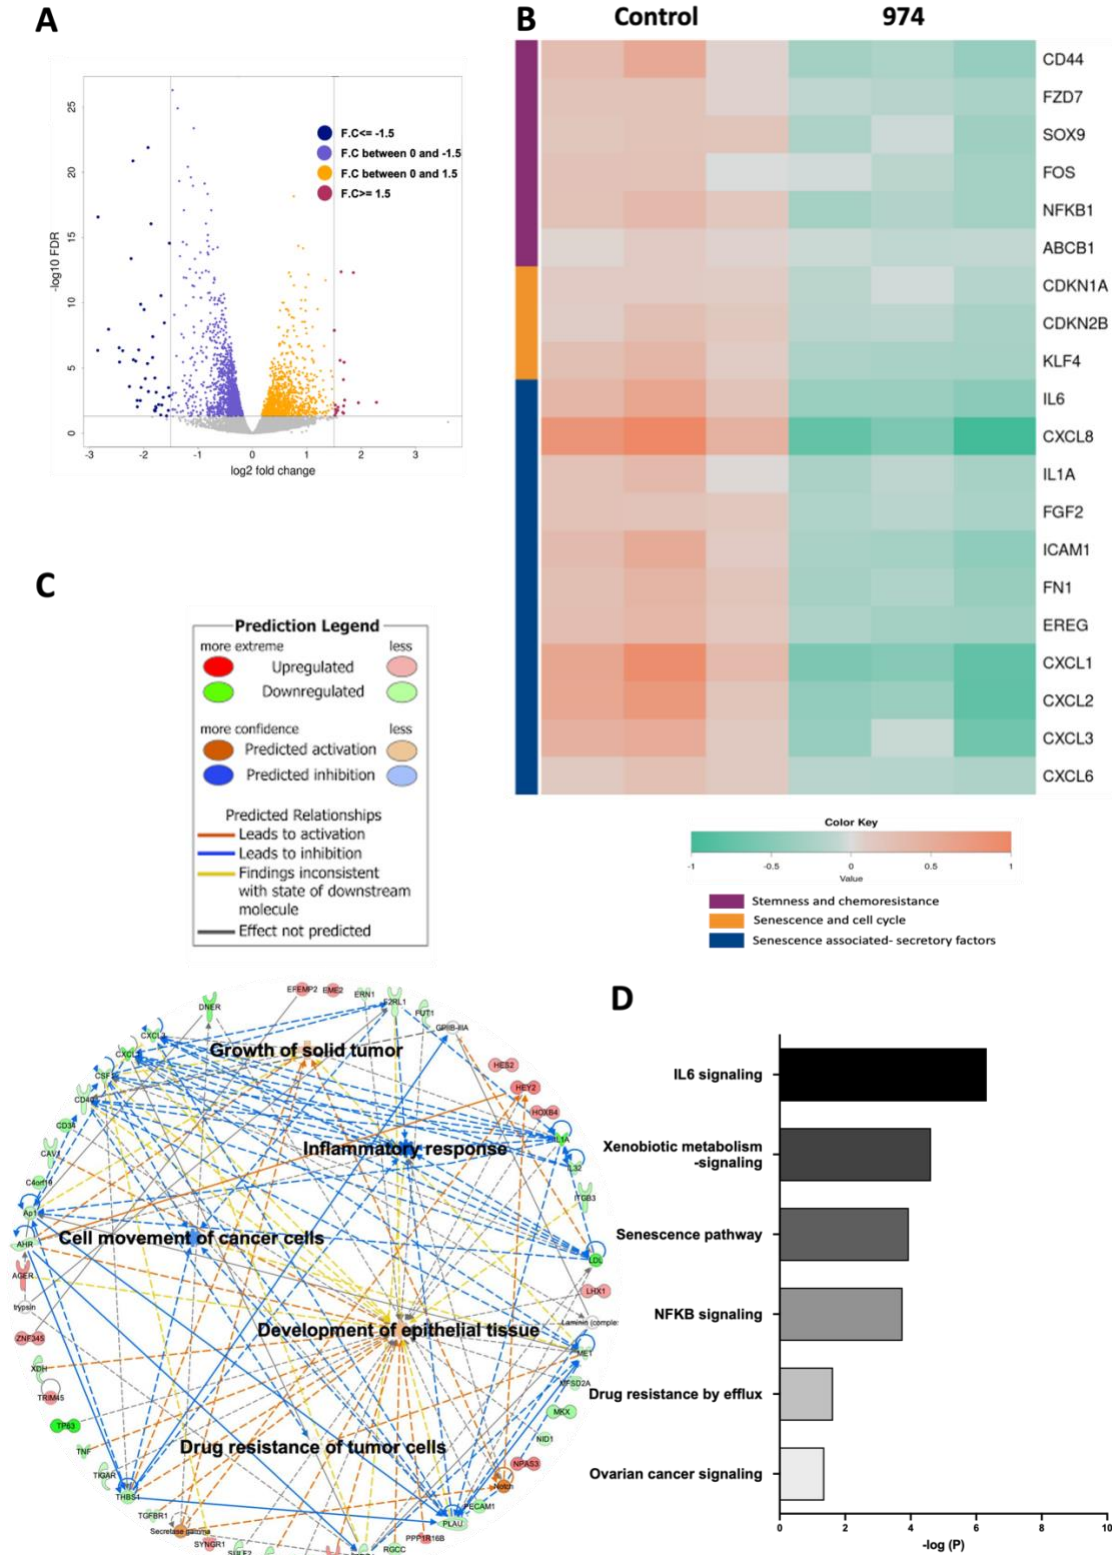

525

526 **Figure 4. ALDH1A1 inhibition suppresses pathways involved in chemoresistance and**  
527 **stemness.** RNA-seq was performed on OVCAR3 cells treated with compound 974 (5 $\mu$ M for 48h)  
528 or DMSO (n=3). **A.** Volcano plot of genes up and downregulated by ALDH1A1 inhibition. **B.**  
529 Heatmap of selected genes significantly downregulated by compound 974 (FDR < 0.05). **C.**  
530 Networks of biological processes constructed using significantly altered genes (FDR < 0.05)  
531 between OVCAR3 cells treated with 974 or DMSO. **D.** Canonical pathways related to stemness  
532 and chemoresistance identified by Ingenuity pathway analysis (IPA) using genes significantly  
533 altered by 974 treatment (FDR < 0.05, Fold change>|1.5|).

534 **Figure 5**

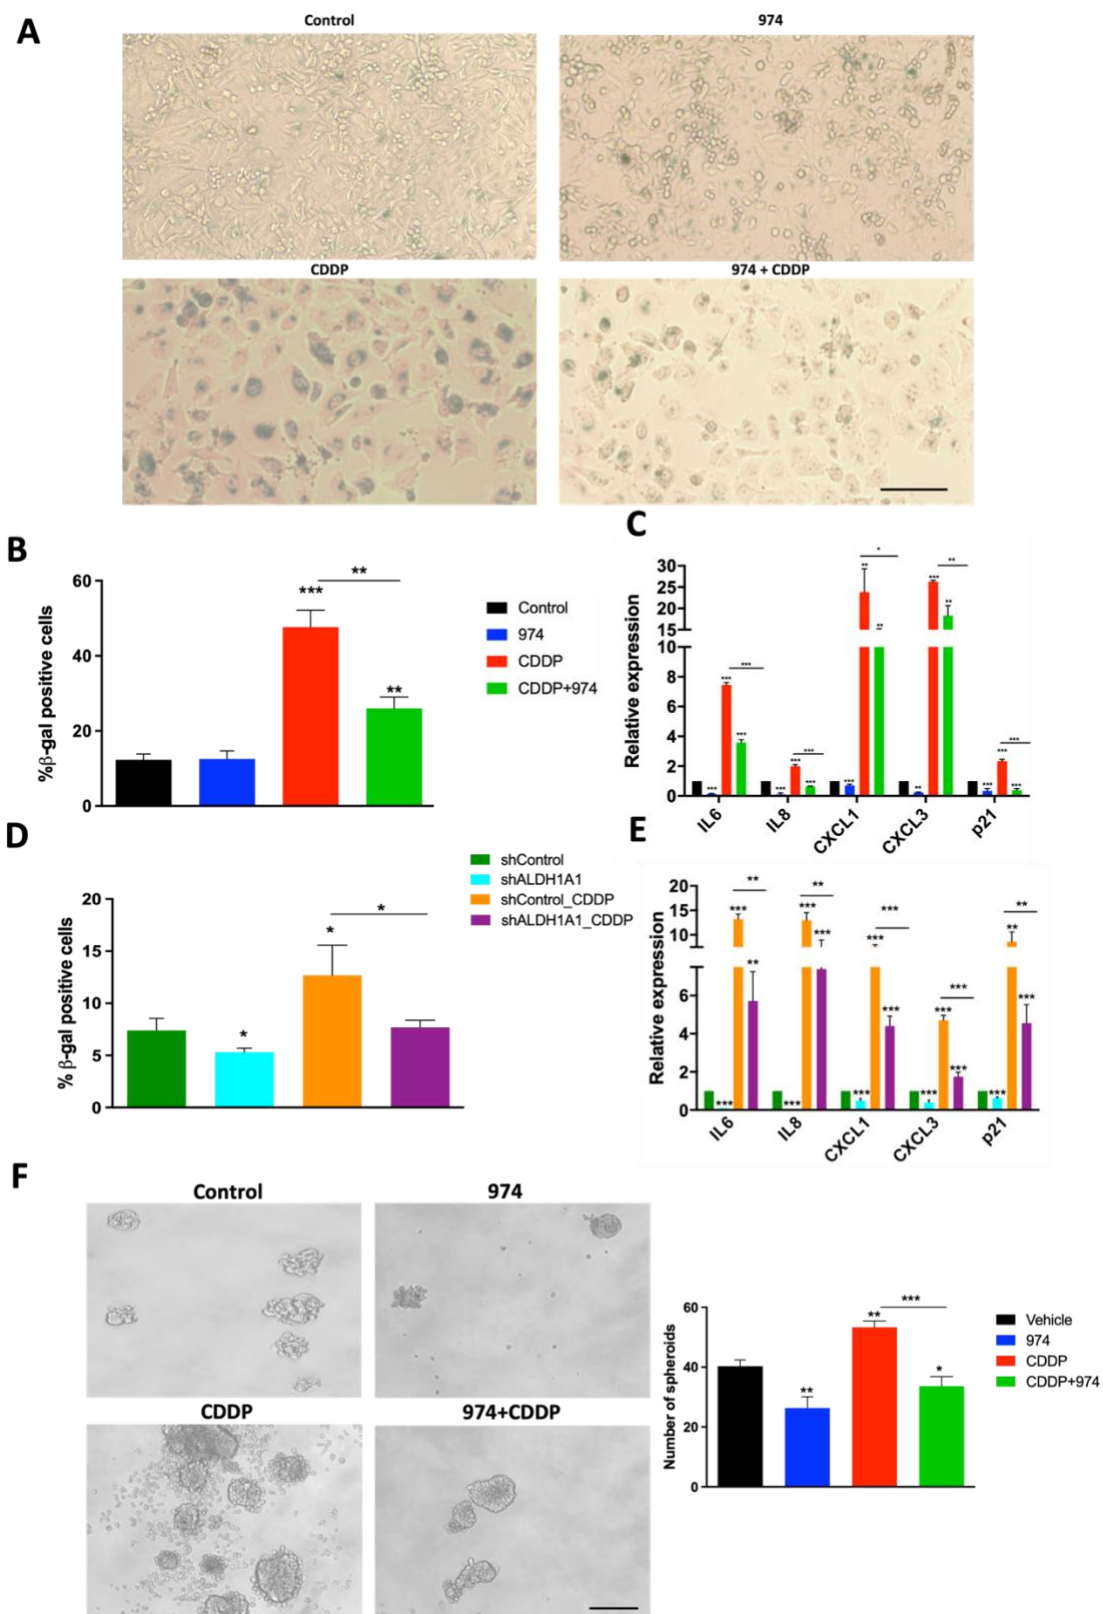

535 **Figure 5. ALDH1A1 inhibition suppresses chemotherapy induced senescence and**  
536 **stemness in HGSOC cells. A.** Senescence associated (SA) Beta-gal assay was performed on  
537 OVCAR3 cells treated with DMSO, compound 974 (5 $\mu$ M for 48h), cisplatin (CDDP) (15 $\mu$ M for  
538 16h) or both. Representative images at 10X magnification. **B.** Quantification of SA-Beta-gal assay  
539 represents percentage of senescent cells averaged from 5 different fields in each condition. **C.**  
540 Expression of SASP genes and p21 (CIP1/WAF1) was examined by qPCR in OVCAR3 cells  
541 treated as in A. **D.** Percentage of SA-Beta gal positive cells in shControl or shALDH1A1 cells  
542 treated with NaCl (vehicle) or CDDP (15 $\mu$ M for 16h) was measured by flow cytometry using Spider  
543 beta gal reagent. **E.** Expression of p21 and SASP genes was examined by qPCR in shControl or  
544 shALDH1A1 cells treated with NaCl or CDDP (15 $\mu$ M for 16h). **F.** OVCAR3 cells treated with  
545 DMSO, compound 974 (5 $\mu$ M for 48h), cisplatin (CDDP) (7.5 $\mu$ M;  $\frac{1}{2}$  IC50 for 3h) or both were plated  
546 in low-attachment conditions at a density of 500 cells/well. Representative spheroid images  
547 captured on Day 7 (left). Quantification of spheroids (right). Error bars represent SEM; n =3  
548 independent experiments of triplicate assays. Data are presented as mean  $\pm$  SEM with p < 0.05  
549 (\*), p < 0.01 (\*\*), and p < 0.005 (\*\*\*). Scale bar, 100 $\mu$ m.
